# Supplementary material for: Hydrothermal liquefaction of different waste biomass using green solvent 2-methyltetrahydrofuran as extractant and co-solvent
Source: Royal Society of Chemistry journal article supplement (doi:10.1039/d4su00259h), 2024-01-01
Supplement: d4su00259h1.pdf [file d4su00259h1.pdf]

## **Supplementary information**

# **Hydrothermal Liquefaction of Different Waste Biomass using Green Solvent 2- Methyltetrahydrofuran as Extractant and Co- Solvent**

Yuen Wai Lui, Sze Ha Tsang, Tsz Hin Chan, Ka Hei Chan, Yin Hei Lee,  
Hoi Fung Man, Matthew Y. Lui\*

*Department of Chemistry, Faculty of Science, Hong Kong Baptist  
University, Kowloon Tong, Hong Kong SAR*

matthew-lui@hkbu.edu.hk

**Table S1.** The list of products detected in GC-MS in TCM HTL under different reaction conditions.

| Compounds                               | Extractant |         | Under CO <sub>2</sub> |         | Co-solvent |         |      | 1-BuOH | EtOH |
|-----------------------------------------|------------|---------|-----------------------|---------|------------|---------|------|--------|------|
|                                         | Under air  |         | DCM                   | 2-MeTHF | 5 mL       | 10 mL   | 5 mL |        |      |
|                                         | DCM        | 2-MeTHF | DCM                   | 2-MeTHF | 2-MeTHF    | 2-MeTHF | THF  |        |      |
| Phenol                                  | ✓          | ✓       | ✓                     | ✓       | ✓          | ✓       | ✓    | ✓      | ✓    |
| 3-Methyl-1,2-cyclopentanedione          | ✓          | ✓       | ✓                     | ✓       | ✓          | ✓       |      |        | ✓    |
| Guaiacol                                |            | ✓       |                       |         | ✓          | ✓       |      | ✓      | ✓    |
| Syringol                                | ✓          | ✓       | ✓                     | ✓       |            |         |      | ✓      |      |
| Hexadecanoic acid                       | ✓          | ✓       |                       | ✓       | ✓          |         | ✓    | ✓      | ✓    |
| Octadecanoic acid                       | ✓          | ✓       | ✓                     | ✓       | ✓          | ✓       |      | ✓      |      |
| 9,12,15-Octadecatrienoic acid, (Z,Z,Z)- |            | ✓       | ✓                     |         | ✓          | ✓       |      | ✓      |      |
| Oleic acid                              | ✓          | ✓       | ✓                     | ✓       | ✓          | ✓       | ✓    | ✓      | ✓    |
| Erucic acid                             | ✓          | ✓       | ✓                     | ✓       | ✓          | ✓       | ✓    |        | ✓    |
| 9-Octadecenamide, (Z)-                  | ✓          | ✓       | ✓                     | ✓       | ✓          | ✓       | ✓    |        | ✓    |
| γ-Sitosterol                            | ✓          | ✓       |                       |         | ✓          | ✓       |      | ✓      |      |
| Stigmastan-3,5-diene                    |            | ✓       | ✓                     | ✓       | ✓          | ✓       | ✓    | ✓      |      |
| Hexadecanoic acid, butyl ester          |            |         |                       |         |            |         |      | ✓      |      |
| Octadecanoic acid, butyl ester          |            |         |                       |         |            |         |      | ✓      |      |
| Hexadecanoic acid, ethyl ester          |            |         |                       |         |            |         |      |        | ✓    |
| Octadecanoic acid, ethyl ester          |            |         |                       |         |            |         |      |        | ✓    |
| Linoleic acid ethyl ester               |            |         |                       |         |            |         |      |        | ✓    |
| Eicosanoic acid, ethyl ester            |            |         |                       |         |            |         |      |        | ✓    |
| Ethyl oleate                            |            |         |                       |         |            |         |      |        | ✓    |
| 13,17,21-Trimethyltriacontane           |            | ✓       |                       | ✓       | ✓          |         | ✓    |        | ✓    |





**Table S4.** C, H, N, O wt % of bio-oils from HTL of different substrates under different conditions.

| Entry | Substrate | Extraction solvent (mL) | Co-solvent (mL) | Processing atmosphere | C (%) | H (%) | N (%) | O (%) |    |      |         |    |                 |      |      |     |      |         |  |           |  |    |      |         |    |                 |      |      |     |      |         |  |           |  |    |      |         |    |                 |      |      |     |      |         |  |           |  |    |      |         |    |                 |      |     |     |      |         |  |           |  |    |      |         |    |                 |      |     |     |      |         |  |           |  |    |      |         |    |                 |      |     |     |      |         |  |           |  |    |      |         |    |                 |      |     |     |      |         |  |           |  |    |      |         |    |                 |      |     |     |      |         |  |           |  |    |      |         |    |                 |      |     |     |      |         |  |           |  |    |      |         |    |                 |      |     |     |      |         |  |           |  |    |      |         |    |                 |      |     |     |      |         |  |           |  |    |      |         |    |                 |      |     |     |      |         |  |           |  |    |      |         |    |                 |      |     |     |      |         |  |           |  |    |      |         |    |                |      |     |     |      |         |  |           |  |    |      |     |    |     |      |     |     |      |         |  |           |  |    |      |     |    |     |      |     |     |      |         |  |           |  |    |      |     |   |     |      |     |     |      |         |  |          |  |    |      |     |   |     |      |     |     |
|-------|-----------|-------------------------|-----------------|-----------------------|-------|-------|-------|-------|----|------|---------|----|-----------------|------|------|-----|------|---------|--|-----------|--|----|------|---------|----|-----------------|------|------|-----|------|---------|--|-----------|--|----|------|---------|----|-----------------|------|------|-----|------|---------|--|-----------|--|----|------|---------|----|-----------------|------|-----|-----|------|---------|--|-----------|--|----|------|---------|----|-----------------|------|-----|-----|------|---------|--|-----------|--|----|------|---------|----|-----------------|------|-----|-----|------|---------|--|-----------|--|----|------|---------|----|-----------------|------|-----|-----|------|---------|--|-----------|--|----|------|---------|----|-----------------|------|-----|-----|------|---------|--|-----------|--|----|------|---------|----|-----------------|------|-----|-----|------|---------|--|-----------|--|----|------|---------|----|-----------------|------|-----|-----|------|---------|--|-----------|--|----|------|---------|----|-----------------|------|-----|-----|------|---------|--|-----------|--|----|------|---------|----|-----------------|------|-----|-----|------|---------|--|-----------|--|----|------|---------|----|-----------------|------|-----|-----|------|---------|--|-----------|--|----|------|---------|----|----------------|------|-----|-----|------|---------|--|-----------|--|----|------|-----|----|-----|------|-----|-----|------|---------|--|-----------|--|----|------|-----|----|-----|------|-----|-----|------|---------|--|-----------|--|----|------|-----|---|-----|------|-----|-----|------|---------|--|----------|--|----|------|-----|---|-----|------|-----|-----|
| 1     | TCM       | DCM                     | /               | Air                   | 78.7  | 10.5  | 1.7   | 9.1   |    |      |         |    |                 |      |      |     |      |         |  |           |  |    |      |         |    |                 |      |      |     |      |         |  |           |  |    |      |         |    |                 |      |      |     |      |         |  |           |  |    |      |         |    |                 |      |     |     |      |         |  |           |  |    |      |         |    |                 |      |     |     |      |         |  |           |  |    |      |         |    |                 |      |     |     |      |         |  |           |  |    |      |         |    |                 |      |     |     |      |         |  |           |  |    |      |         |    |                 |      |     |     |      |         |  |           |  |    |      |         |    |                 |      |     |     |      |         |  |           |  |    |      |         |    |                 |      |     |     |      |         |  |           |  |    |      |         |    |                 |      |     |     |      |         |  |           |  |    |      |         |    |                 |      |     |     |      |         |  |           |  |    |      |         |    |                 |      |     |     |      |         |  |           |  |    |      |         |    |                |      |     |     |      |         |  |           |  |    |      |     |    |     |      |     |     |      |         |  |           |  |    |      |     |    |     |      |     |     |      |         |  |           |  |    |      |     |   |     |      |     |     |      |         |  |          |  |    |      |     |   |     |      |     |     |
|       | Residue   |                         |                 |                       |       |       |       |       | 2  | TCM  | DCM     | /  | CO <sub>2</sub> | 74.5 | 8.4  | 2.9 | 14.2 | Residue |  |           |  | 3  | TCM  | 2-MeTHF | /  | Air             | 76.5 | 10.7 | 2.2 | 10.6 | Residue |  |           |  | 4  | TCM  | 2-MeTHF | /  | CO <sub>2</sub> | 78.3 | 11.0 | 0.8 | 9.9  | Residue |  |           |  | 5  | TCM  | DCM     | 5  | Air             | 74.9 | 9.1 | 2.9 | 13.1 | Residue |  | (2-MeTHF) |  | 6  | TCM  | DCM     | 10 | Air             | 75.4 | 9.4 | 1.7 | 13.5 | Residue |  | (2-MeTHF) |  | 7  | TCM  | DCM     | 5  | Air             | 73.4 | 9.6 | 2.9 | 14.1 | Residue |  | (THF)     |  | 8  | TCM  | DCM     | 5  | Air             | 73.4 | 7.9 | 3.1 | 15.7 | Residue |  | (1-BuOH)  |  | 9  | TCM  | DCM     | 5  | Air             | 74.6 | 9.1 | 2.7 | 13.6 | Residue |  | (EtOH)    |  | 10 | Pine | DCM     | /  | Air             | 68.4 | 6.4 | 0.0 | 25.2 | Sawdust |  |           |  | 11 | Pine | DCM     | /  | CO <sub>2</sub> | 69.2 | 6.3 | 0.0 | 24.5 | Sawdust |  |           |  | 12 | Pine | DCM     | /  | N <sub>2</sub>  | 68.0 | 6.8 | 0.0 | 25.2 | Sawdust |  |           |  | 13 | Pine | 2-MeTHF | /  | Air             | 70.2 | 6.7 | 0.0 | 23.1 | Sawdust |  |           |  | 14 | Pine | 2-MeTHF | /  | CO <sub>2</sub> | 67.4 | 5.6 | 0.0 | 27.0 | Sawdust |  |           |  | 15 | Pine | 2-MeTHF | /  | N <sub>2</sub> | 65.8 | 6.5 | 0.3 | 27.4 | Sawdust |  |           |  | 16 | Pine | DCM | 5  | Air | 71.6 | 7.8 | 0.2 | 20.4 | Sawdust |  | (2-MeTHF) |  | 17 | Pine | DCM | 10 | Air | 69.0 | 7.3 | 0.3 | 23.4 | Sawdust |  | (2-MeTHF) |  | 18 | Pine | DCM | 5 | Air | 69.5 | 6.4 | 0.0 | 24.1 | Sawdust |  | (THF)    |  | 19 | Pine | DCM | 5 | Air | 68.8 | 6.7 | 0.0 |
| 2     | TCM       | DCM                     | /               | CO <sub>2</sub>       | 74.5  | 8.4   | 2.9   | 14.2  |    |      |         |    |                 |      |      |     |      |         |  |           |  |    |      |         |    |                 |      |      |     |      |         |  |           |  |    |      |         |    |                 |      |      |     |      |         |  |           |  |    |      |         |    |                 |      |     |     |      |         |  |           |  |    |      |         |    |                 |      |     |     |      |         |  |           |  |    |      |         |    |                 |      |     |     |      |         |  |           |  |    |      |         |    |                 |      |     |     |      |         |  |           |  |    |      |         |    |                 |      |     |     |      |         |  |           |  |    |      |         |    |                 |      |     |     |      |         |  |           |  |    |      |         |    |                 |      |     |     |      |         |  |           |  |    |      |         |    |                 |      |     |     |      |         |  |           |  |    |      |         |    |                 |      |     |     |      |         |  |           |  |    |      |         |    |                 |      |     |     |      |         |  |           |  |    |      |         |    |                |      |     |     |      |         |  |           |  |    |      |     |    |     |      |     |     |      |         |  |           |  |    |      |     |    |     |      |     |     |      |         |  |           |  |    |      |     |   |     |      |     |     |      |         |  |          |  |    |      |     |   |     |      |     |     |
|       | Residue   |                         |                 |                       |       |       |       |       | 3  | TCM  | 2-MeTHF | /  | Air             | 76.5 | 10.7 | 2.2 | 10.6 | Residue |  |           |  | 4  | TCM  | 2-MeTHF | /  | CO <sub>2</sub> | 78.3 | 11.0 | 0.8 | 9.9  | Residue |  |           |  | 5  | TCM  | DCM     | 5  | Air             | 74.9 | 9.1  | 2.9 | 13.1 | Residue |  | (2-MeTHF) |  | 6  | TCM  | DCM     | 10 | Air             | 75.4 | 9.4 | 1.7 | 13.5 | Residue |  | (2-MeTHF) |  | 7  | TCM  | DCM     | 5  | Air             | 73.4 | 9.6 | 2.9 | 14.1 | Residue |  | (THF)     |  | 8  | TCM  | DCM     | 5  | Air             | 73.4 | 7.9 | 3.1 | 15.7 | Residue |  | (1-BuOH)  |  | 9  | TCM  | DCM     | 5  | Air             | 74.6 | 9.1 | 2.7 | 13.6 | Residue |  | (EtOH)    |  | 10 | Pine | DCM     | /  | Air             | 68.4 | 6.4 | 0.0 | 25.2 | Sawdust |  |           |  | 11 | Pine | DCM     | /  | CO <sub>2</sub> | 69.2 | 6.3 | 0.0 | 24.5 | Sawdust |  |           |  | 12 | Pine | DCM     | /  | N <sub>2</sub>  | 68.0 | 6.8 | 0.0 | 25.2 | Sawdust |  |           |  | 13 | Pine | 2-MeTHF | /  | Air             | 70.2 | 6.7 | 0.0 | 23.1 | Sawdust |  |           |  | 14 | Pine | 2-MeTHF | /  | CO <sub>2</sub> | 67.4 | 5.6 | 0.0 | 27.0 | Sawdust |  |           |  | 15 | Pine | 2-MeTHF | /  | N <sub>2</sub>  | 65.8 | 6.5 | 0.3 | 27.4 | Sawdust |  |           |  | 16 | Pine | DCM     | 5  | Air            | 71.6 | 7.8 | 0.2 | 20.4 | Sawdust |  | (2-MeTHF) |  | 17 | Pine | DCM | 10 | Air | 69.0 | 7.3 | 0.3 | 23.4 | Sawdust |  | (2-MeTHF) |  | 18 | Pine | DCM | 5  | Air | 69.5 | 6.4 | 0.0 | 24.1 | Sawdust |  | (THF)     |  | 19 | Pine | DCM | 5 | Air | 68.8 | 6.7 | 0.0 | 24.5 | Sawdust |  | (1-BuOH) |  |    |      |     |   |     |      |     |     |
| 3     | TCM       | 2-MeTHF                 | /               | Air                   | 76.5  | 10.7  | 2.2   | 10.6  |    |      |         |    |                 |      |      |     |      |         |  |           |  |    |      |         |    |                 |      |      |     |      |         |  |           |  |    |      |         |    |                 |      |      |     |      |         |  |           |  |    |      |         |    |                 |      |     |     |      |         |  |           |  |    |      |         |    |                 |      |     |     |      |         |  |           |  |    |      |         |    |                 |      |     |     |      |         |  |           |  |    |      |         |    |                 |      |     |     |      |         |  |           |  |    |      |         |    |                 |      |     |     |      |         |  |           |  |    |      |         |    |                 |      |     |     |      |         |  |           |  |    |      |         |    |                 |      |     |     |      |         |  |           |  |    |      |         |    |                 |      |     |     |      |         |  |           |  |    |      |         |    |                 |      |     |     |      |         |  |           |  |    |      |         |    |                 |      |     |     |      |         |  |           |  |    |      |         |    |                |      |     |     |      |         |  |           |  |    |      |     |    |     |      |     |     |      |         |  |           |  |    |      |     |    |     |      |     |     |      |         |  |           |  |    |      |     |   |     |      |     |     |      |         |  |          |  |    |      |     |   |     |      |     |     |
|       | Residue   |                         |                 |                       |       |       |       |       | 4  | TCM  | 2-MeTHF | /  | CO <sub>2</sub> | 78.3 | 11.0 | 0.8 | 9.9  | Residue |  |           |  | 5  | TCM  | DCM     | 5  | Air             | 74.9 | 9.1  | 2.9 | 13.1 | Residue |  | (2-MeTHF) |  | 6  | TCM  | DCM     | 10 | Air             | 75.4 | 9.4  | 1.7 | 13.5 | Residue |  | (2-MeTHF) |  | 7  | TCM  | DCM     | 5  | Air             | 73.4 | 9.6 | 2.9 | 14.1 | Residue |  | (THF)     |  | 8  | TCM  | DCM     | 5  | Air             | 73.4 | 7.9 | 3.1 | 15.7 | Residue |  | (1-BuOH)  |  | 9  | TCM  | DCM     | 5  | Air             | 74.6 | 9.1 | 2.7 | 13.6 | Residue |  | (EtOH)    |  | 10 | Pine | DCM     | /  | Air             | 68.4 | 6.4 | 0.0 | 25.2 | Sawdust |  |           |  | 11 | Pine | DCM     | /  | CO <sub>2</sub> | 69.2 | 6.3 | 0.0 | 24.5 | Sawdust |  |           |  | 12 | Pine | DCM     | /  | N <sub>2</sub>  | 68.0 | 6.8 | 0.0 | 25.2 | Sawdust |  |           |  | 13 | Pine | 2-MeTHF | /  | Air             | 70.2 | 6.7 | 0.0 | 23.1 | Sawdust |  |           |  | 14 | Pine | 2-MeTHF | /  | CO <sub>2</sub> | 67.4 | 5.6 | 0.0 | 27.0 | Sawdust |  |           |  | 15 | Pine | 2-MeTHF | /  | N <sub>2</sub>  | 65.8 | 6.5 | 0.3 | 27.4 | Sawdust |  |           |  | 16 | Pine | DCM     | 5  | Air             | 71.6 | 7.8 | 0.2 | 20.4 | Sawdust |  | (2-MeTHF) |  | 17 | Pine | DCM     | 10 | Air            | 69.0 | 7.3 | 0.3 | 23.4 | Sawdust |  | (2-MeTHF) |  | 18 | Pine | DCM | 5  | Air | 69.5 | 6.4 | 0.0 | 24.1 | Sawdust |  | (THF)     |  | 19 | Pine | DCM | 5  | Air | 68.8 | 6.7 | 0.0 | 24.5 | Sawdust |  | (1-BuOH)  |  |    |      |     |   |     |      |     |     |      |         |  |          |  |    |      |     |   |     |      |     |     |
| 4     | TCM       | 2-MeTHF                 | /               | CO <sub>2</sub>       | 78.3  | 11.0  | 0.8   | 9.9   |    |      |         |    |                 |      |      |     |      |         |  |           |  |    |      |         |    |                 |      |      |     |      |         |  |           |  |    |      |         |    |                 |      |      |     |      |         |  |           |  |    |      |         |    |                 |      |     |     |      |         |  |           |  |    |      |         |    |                 |      |     |     |      |         |  |           |  |    |      |         |    |                 |      |     |     |      |         |  |           |  |    |      |         |    |                 |      |     |     |      |         |  |           |  |    |      |         |    |                 |      |     |     |      |         |  |           |  |    |      |         |    |                 |      |     |     |      |         |  |           |  |    |      |         |    |                 |      |     |     |      |         |  |           |  |    |      |         |    |                 |      |     |     |      |         |  |           |  |    |      |         |    |                 |      |     |     |      |         |  |           |  |    |      |         |    |                 |      |     |     |      |         |  |           |  |    |      |         |    |                |      |     |     |      |         |  |           |  |    |      |     |    |     |      |     |     |      |         |  |           |  |    |      |     |    |     |      |     |     |      |         |  |           |  |    |      |     |   |     |      |     |     |      |         |  |          |  |    |      |     |   |     |      |     |     |
|       | Residue   |                         |                 |                       |       |       |       |       | 5  | TCM  | DCM     | 5  | Air             | 74.9 | 9.1  | 2.9 | 13.1 | Residue |  | (2-MeTHF) |  | 6  | TCM  | DCM     | 10 | Air             | 75.4 | 9.4  | 1.7 | 13.5 | Residue |  | (2-MeTHF) |  | 7  | TCM  | DCM     | 5  | Air             | 73.4 | 9.6  | 2.9 | 14.1 | Residue |  | (THF)     |  | 8  | TCM  | DCM     | 5  | Air             | 73.4 | 7.9 | 3.1 | 15.7 | Residue |  | (1-BuOH)  |  | 9  | TCM  | DCM     | 5  | Air             | 74.6 | 9.1 | 2.7 | 13.6 | Residue |  | (EtOH)    |  | 10 | Pine | DCM     | /  | Air             | 68.4 | 6.4 | 0.0 | 25.2 | Sawdust |  |           |  | 11 | Pine | DCM     | /  | CO <sub>2</sub> | 69.2 | 6.3 | 0.0 | 24.5 | Sawdust |  |           |  | 12 | Pine | DCM     | /  | N <sub>2</sub>  | 68.0 | 6.8 | 0.0 | 25.2 | Sawdust |  |           |  | 13 | Pine | 2-MeTHF | /  | Air             | 70.2 | 6.7 | 0.0 | 23.1 | Sawdust |  |           |  | 14 | Pine | 2-MeTHF | /  | CO <sub>2</sub> | 67.4 | 5.6 | 0.0 | 27.0 | Sawdust |  |           |  | 15 | Pine | 2-MeTHF | /  | N <sub>2</sub>  | 65.8 | 6.5 | 0.3 | 27.4 | Sawdust |  |           |  | 16 | Pine | DCM     | 5  | Air             | 71.6 | 7.8 | 0.2 | 20.4 | Sawdust |  | (2-MeTHF) |  | 17 | Pine | DCM     | 10 | Air             | 69.0 | 7.3 | 0.3 | 23.4 | Sawdust |  | (2-MeTHF) |  | 18 | Pine | DCM     | 5  | Air            | 69.5 | 6.4 | 0.0 | 24.1 | Sawdust |  | (THF)     |  | 19 | Pine | DCM | 5  | Air | 68.8 | 6.7 | 0.0 | 24.5 | Sawdust |  | (1-BuOH)  |  |    |      |     |    |     |      |     |     |      |         |  |           |  |    |      |     |   |     |      |     |     |      |         |  |          |  |    |      |     |   |     |      |     |     |
| 5     | TCM       | DCM                     | 5               | Air                   | 74.9  | 9.1   | 2.9   | 13.1  |    |      |         |    |                 |      |      |     |      |         |  |           |  |    |      |         |    |                 |      |      |     |      |         |  |           |  |    |      |         |    |                 |      |      |     |      |         |  |           |  |    |      |         |    |                 |      |     |     |      |         |  |           |  |    |      |         |    |                 |      |     |     |      |         |  |           |  |    |      |         |    |                 |      |     |     |      |         |  |           |  |    |      |         |    |                 |      |     |     |      |         |  |           |  |    |      |         |    |                 |      |     |     |      |         |  |           |  |    |      |         |    |                 |      |     |     |      |         |  |           |  |    |      |         |    |                 |      |     |     |      |         |  |           |  |    |      |         |    |                 |      |     |     |      |         |  |           |  |    |      |         |    |                 |      |     |     |      |         |  |           |  |    |      |         |    |                 |      |     |     |      |         |  |           |  |    |      |         |    |                |      |     |     |      |         |  |           |  |    |      |     |    |     |      |     |     |      |         |  |           |  |    |      |     |    |     |      |     |     |      |         |  |           |  |    |      |     |   |     |      |     |     |      |         |  |          |  |    |      |     |   |     |      |     |     |
|       | Residue   |                         | (2-MeTHF)       |                       |       |       |       |       | 6  | TCM  | DCM     | 10 | Air             | 75.4 | 9.4  | 1.7 | 13.5 | Residue |  | (2-MeTHF) |  | 7  | TCM  | DCM     | 5  | Air             | 73.4 | 9.6  | 2.9 | 14.1 | Residue |  | (THF)     |  | 8  | TCM  | DCM     | 5  | Air             | 73.4 | 7.9  | 3.1 | 15.7 | Residue |  | (1-BuOH)  |  | 9  | TCM  | DCM     | 5  | Air             | 74.6 | 9.1 | 2.7 | 13.6 | Residue |  | (EtOH)    |  | 10 | Pine | DCM     | /  | Air             | 68.4 | 6.4 | 0.0 | 25.2 | Sawdust |  |           |  | 11 | Pine | DCM     | /  | CO <sub>2</sub> | 69.2 | 6.3 | 0.0 | 24.5 | Sawdust |  |           |  | 12 | Pine | DCM     | /  | N <sub>2</sub>  | 68.0 | 6.8 | 0.0 | 25.2 | Sawdust |  |           |  | 13 | Pine | 2-MeTHF | /  | Air             | 70.2 | 6.7 | 0.0 | 23.1 | Sawdust |  |           |  | 14 | Pine | 2-MeTHF | /  | CO <sub>2</sub> | 67.4 | 5.6 | 0.0 | 27.0 | Sawdust |  |           |  | 15 | Pine | 2-MeTHF | /  | N <sub>2</sub>  | 65.8 | 6.5 | 0.3 | 27.4 | Sawdust |  |           |  | 16 | Pine | DCM     | 5  | Air             | 71.6 | 7.8 | 0.2 | 20.4 | Sawdust |  | (2-MeTHF) |  | 17 | Pine | DCM     | 10 | Air             | 69.0 | 7.3 | 0.3 | 23.4 | Sawdust |  | (2-MeTHF) |  | 18 | Pine | DCM     | 5  | Air             | 69.5 | 6.4 | 0.0 | 24.1 | Sawdust |  | (THF)     |  | 19 | Pine | DCM     | 5  | Air            | 68.8 | 6.7 | 0.0 | 24.5 | Sawdust |  | (1-BuOH)  |  |    |      |     |    |     |      |     |     |      |         |  |           |  |    |      |     |    |     |      |     |     |      |         |  |           |  |    |      |     |   |     |      |     |     |      |         |  |          |  |    |      |     |   |     |      |     |     |
| 6     | TCM       | DCM                     | 10              | Air                   | 75.4  | 9.4   | 1.7   | 13.5  |    |      |         |    |                 |      |      |     |      |         |  |           |  |    |      |         |    |                 |      |      |     |      |         |  |           |  |    |      |         |    |                 |      |      |     |      |         |  |           |  |    |      |         |    |                 |      |     |     |      |         |  |           |  |    |      |         |    |                 |      |     |     |      |         |  |           |  |    |      |         |    |                 |      |     |     |      |         |  |           |  |    |      |         |    |                 |      |     |     |      |         |  |           |  |    |      |         |    |                 |      |     |     |      |         |  |           |  |    |      |         |    |                 |      |     |     |      |         |  |           |  |    |      |         |    |                 |      |     |     |      |         |  |           |  |    |      |         |    |                 |      |     |     |      |         |  |           |  |    |      |         |    |                 |      |     |     |      |         |  |           |  |    |      |         |    |                 |      |     |     |      |         |  |           |  |    |      |         |    |                |      |     |     |      |         |  |           |  |    |      |     |    |     |      |     |     |      |         |  |           |  |    |      |     |    |     |      |     |     |      |         |  |           |  |    |      |     |   |     |      |     |     |      |         |  |          |  |    |      |     |   |     |      |     |     |
|       | Residue   |                         | (2-MeTHF)       |                       |       |       |       |       | 7  | TCM  | DCM     | 5  | Air             | 73.4 | 9.6  | 2.9 | 14.1 | Residue |  | (THF)     |  | 8  | TCM  | DCM     | 5  | Air             | 73.4 | 7.9  | 3.1 | 15.7 | Residue |  | (1-BuOH)  |  | 9  | TCM  | DCM     | 5  | Air             | 74.6 | 9.1  | 2.7 | 13.6 | Residue |  | (EtOH)    |  | 10 | Pine | DCM     | /  | Air             | 68.4 | 6.4 | 0.0 | 25.2 | Sawdust |  |           |  | 11 | Pine | DCM     | /  | CO <sub>2</sub> | 69.2 | 6.3 | 0.0 | 24.5 | Sawdust |  |           |  | 12 | Pine | DCM     | /  | N <sub>2</sub>  | 68.0 | 6.8 | 0.0 | 25.2 | Sawdust |  |           |  | 13 | Pine | 2-MeTHF | /  | Air             | 70.2 | 6.7 | 0.0 | 23.1 | Sawdust |  |           |  | 14 | Pine | 2-MeTHF | /  | CO <sub>2</sub> | 67.4 | 5.6 | 0.0 | 27.0 | Sawdust |  |           |  | 15 | Pine | 2-MeTHF | /  | N <sub>2</sub>  | 65.8 | 6.5 | 0.3 | 27.4 | Sawdust |  |           |  | 16 | Pine | DCM     | 5  | Air             | 71.6 | 7.8 | 0.2 | 20.4 | Sawdust |  | (2-MeTHF) |  | 17 | Pine | DCM     | 10 | Air             | 69.0 | 7.3 | 0.3 | 23.4 | Sawdust |  | (2-MeTHF) |  | 18 | Pine | DCM     | 5  | Air             | 69.5 | 6.4 | 0.0 | 24.1 | Sawdust |  | (THF)     |  | 19 | Pine | DCM     | 5  | Air             | 68.8 | 6.7 | 0.0 | 24.5 | Sawdust |  | (1-BuOH)  |  |    |      |         |    |                |      |     |     |      |         |  |           |  |    |      |     |    |     |      |     |     |      |         |  |           |  |    |      |     |    |     |      |     |     |      |         |  |           |  |    |      |     |   |     |      |     |     |      |         |  |          |  |    |      |     |   |     |      |     |     |
| 7     | TCM       | DCM                     | 5               | Air                   | 73.4  | 9.6   | 2.9   | 14.1  |    |      |         |    |                 |      |      |     |      |         |  |           |  |    |      |         |    |                 |      |      |     |      |         |  |           |  |    |      |         |    |                 |      |      |     |      |         |  |           |  |    |      |         |    |                 |      |     |     |      |         |  |           |  |    |      |         |    |                 |      |     |     |      |         |  |           |  |    |      |         |    |                 |      |     |     |      |         |  |           |  |    |      |         |    |                 |      |     |     |      |         |  |           |  |    |      |         |    |                 |      |     |     |      |         |  |           |  |    |      |         |    |                 |      |     |     |      |         |  |           |  |    |      |         |    |                 |      |     |     |      |         |  |           |  |    |      |         |    |                 |      |     |     |      |         |  |           |  |    |      |         |    |                 |      |     |     |      |         |  |           |  |    |      |         |    |                 |      |     |     |      |         |  |           |  |    |      |         |    |                |      |     |     |      |         |  |           |  |    |      |     |    |     |      |     |     |      |         |  |           |  |    |      |     |    |     |      |     |     |      |         |  |           |  |    |      |     |   |     |      |     |     |      |         |  |          |  |    |      |     |   |     |      |     |     |
|       | Residue   |                         | (THF)           |                       |       |       |       |       | 8  | TCM  | DCM     | 5  | Air             | 73.4 | 7.9  | 3.1 | 15.7 | Residue |  | (1-BuOH)  |  | 9  | TCM  | DCM     | 5  | Air             | 74.6 | 9.1  | 2.7 | 13.6 | Residue |  | (EtOH)    |  | 10 | Pine | DCM     | /  | Air             | 68.4 | 6.4  | 0.0 | 25.2 | Sawdust |  |           |  | 11 | Pine | DCM     | /  | CO <sub>2</sub> | 69.2 | 6.3 | 0.0 | 24.5 | Sawdust |  |           |  | 12 | Pine | DCM     | /  | N <sub>2</sub>  | 68.0 | 6.8 | 0.0 | 25.2 | Sawdust |  |           |  | 13 | Pine | 2-MeTHF | /  | Air             | 70.2 | 6.7 | 0.0 | 23.1 | Sawdust |  |           |  | 14 | Pine | 2-MeTHF | /  | CO <sub>2</sub> | 67.4 | 5.6 | 0.0 | 27.0 | Sawdust |  |           |  | 15 | Pine | 2-MeTHF | /  | N <sub>2</sub>  | 65.8 | 6.5 | 0.3 | 27.4 | Sawdust |  |           |  | 16 | Pine | DCM     | 5  | Air             | 71.6 | 7.8 | 0.2 | 20.4 | Sawdust |  | (2-MeTHF) |  | 17 | Pine | DCM     | 10 | Air             | 69.0 | 7.3 | 0.3 | 23.4 | Sawdust |  | (2-MeTHF) |  | 18 | Pine | DCM     | 5  | Air             | 69.5 | 6.4 | 0.0 | 24.1 | Sawdust |  | (THF)     |  | 19 | Pine | DCM     | 5  | Air             | 68.8 | 6.7 | 0.0 | 24.5 | Sawdust |  | (1-BuOH)  |  |    |      |         |    |                 |      |     |     |      |         |  |           |  |    |      |         |    |                |      |     |     |      |         |  |           |  |    |      |     |    |     |      |     |     |      |         |  |           |  |    |      |     |    |     |      |     |     |      |         |  |           |  |    |      |     |   |     |      |     |     |      |         |  |          |  |    |      |     |   |     |      |     |     |
| 8     | TCM       | DCM                     | 5               | Air                   | 73.4  | 7.9   | 3.1   | 15.7  |    |      |         |    |                 |      |      |     |      |         |  |           |  |    |      |         |    |                 |      |      |     |      |         |  |           |  |    |      |         |    |                 |      |      |     |      |         |  |           |  |    |      |         |    |                 |      |     |     |      |         |  |           |  |    |      |         |    |                 |      |     |     |      |         |  |           |  |    |      |         |    |                 |      |     |     |      |         |  |           |  |    |      |         |    |                 |      |     |     |      |         |  |           |  |    |      |         |    |                 |      |     |     |      |         |  |           |  |    |      |         |    |                 |      |     |     |      |         |  |           |  |    |      |         |    |                 |      |     |     |      |         |  |           |  |    |      |         |    |                 |      |     |     |      |         |  |           |  |    |      |         |    |                 |      |     |     |      |         |  |           |  |    |      |         |    |                 |      |     |     |      |         |  |           |  |    |      |         |    |                |      |     |     |      |         |  |           |  |    |      |     |    |     |      |     |     |      |         |  |           |  |    |      |     |    |     |      |     |     |      |         |  |           |  |    |      |     |   |     |      |     |     |      |         |  |          |  |    |      |     |   |     |      |     |     |
|       | Residue   |                         | (1-BuOH)        |                       |       |       |       |       | 9  | TCM  | DCM     | 5  | Air             | 74.6 | 9.1  | 2.7 | 13.6 | Residue |  | (EtOH)    |  | 10 | Pine | DCM     | /  | Air             | 68.4 | 6.4  | 0.0 | 25.2 | Sawdust |  |           |  | 11 | Pine | DCM     | /  | CO <sub>2</sub> | 69.2 | 6.3  | 0.0 | 24.5 | Sawdust |  |           |  | 12 | Pine | DCM     | /  | N <sub>2</sub>  | 68.0 | 6.8 | 0.0 | 25.2 | Sawdust |  |           |  | 13 | Pine | 2-MeTHF | /  | Air             | 70.2 | 6.7 | 0.0 | 23.1 | Sawdust |  |           |  | 14 | Pine | 2-MeTHF | /  | CO <sub>2</sub> | 67.4 | 5.6 | 0.0 | 27.0 | Sawdust |  |           |  | 15 | Pine | 2-MeTHF | /  | N <sub>2</sub>  | 65.8 | 6.5 | 0.3 | 27.4 | Sawdust |  |           |  | 16 | Pine | DCM     | 5  | Air             | 71.6 | 7.8 | 0.2 | 20.4 | Sawdust |  | (2-MeTHF) |  | 17 | Pine | DCM     | 10 | Air             | 69.0 | 7.3 | 0.3 | 23.4 | Sawdust |  | (2-MeTHF) |  | 18 | Pine | DCM     | 5  | Air             | 69.5 | 6.4 | 0.0 | 24.1 | Sawdust |  | (THF)     |  | 19 | Pine | DCM     | 5  | Air             | 68.8 | 6.7 | 0.0 | 24.5 | Sawdust |  | (1-BuOH)  |  |    |      |         |    |                 |      |     |     |      |         |  |           |  |    |      |         |    |                 |      |     |     |      |         |  |           |  |    |      |         |    |                |      |     |     |      |         |  |           |  |    |      |     |    |     |      |     |     |      |         |  |           |  |    |      |     |    |     |      |     |     |      |         |  |           |  |    |      |     |   |     |      |     |     |      |         |  |          |  |    |      |     |   |     |      |     |     |
| 9     | TCM       | DCM                     | 5               | Air                   | 74.6  | 9.1   | 2.7   | 13.6  |    |      |         |    |                 |      |      |     |      |         |  |           |  |    |      |         |    |                 |      |      |     |      |         |  |           |  |    |      |         |    |                 |      |      |     |      |         |  |           |  |    |      |         |    |                 |      |     |     |      |         |  |           |  |    |      |         |    |                 |      |     |     |      |         |  |           |  |    |      |         |    |                 |      |     |     |      |         |  |           |  |    |      |         |    |                 |      |     |     |      |         |  |           |  |    |      |         |    |                 |      |     |     |      |         |  |           |  |    |      |         |    |                 |      |     |     |      |         |  |           |  |    |      |         |    |                 |      |     |     |      |         |  |           |  |    |      |         |    |                 |      |     |     |      |         |  |           |  |    |      |         |    |                 |      |     |     |      |         |  |           |  |    |      |         |    |                 |      |     |     |      |         |  |           |  |    |      |         |    |                |      |     |     |      |         |  |           |  |    |      |     |    |     |      |     |     |      |         |  |           |  |    |      |     |    |     |      |     |     |      |         |  |           |  |    |      |     |   |     |      |     |     |      |         |  |          |  |    |      |     |   |     |      |     |     |
|       | Residue   |                         | (EtOH)          |                       |       |       |       |       | 10 | Pine | DCM     | /  | Air             | 68.4 | 6.4  | 0.0 | 25.2 | Sawdust |  |           |  | 11 | Pine | DCM     | /  | CO <sub>2</sub> | 69.2 | 6.3  | 0.0 | 24.5 | Sawdust |  |           |  | 12 | Pine | DCM     | /  | N <sub>2</sub>  | 68.0 | 6.8  | 0.0 | 25.2 | Sawdust |  |           |  | 13 | Pine | 2-MeTHF | /  | Air             | 70.2 | 6.7 | 0.0 | 23.1 | Sawdust |  |           |  | 14 | Pine | 2-MeTHF | /  | CO <sub>2</sub> | 67.4 | 5.6 | 0.0 | 27.0 | Sawdust |  |           |  | 15 | Pine | 2-MeTHF | /  | N <sub>2</sub>  | 65.8 | 6.5 | 0.3 | 27.4 | Sawdust |  |           |  | 16 | Pine | DCM     | 5  | Air             | 71.6 | 7.8 | 0.2 | 20.4 | Sawdust |  | (2-MeTHF) |  | 17 | Pine | DCM     | 10 | Air             | 69.0 | 7.3 | 0.3 | 23.4 | Sawdust |  | (2-MeTHF) |  | 18 | Pine | DCM     | 5  | Air             | 69.5 | 6.4 | 0.0 | 24.1 | Sawdust |  | (THF)     |  | 19 | Pine | DCM     | 5  | Air             | 68.8 | 6.7 | 0.0 | 24.5 | Sawdust |  | (1-BuOH)  |  |    |      |         |    |                 |      |     |     |      |         |  |           |  |    |      |         |    |                 |      |     |     |      |         |  |           |  |    |      |         |    |                 |      |     |     |      |         |  |           |  |    |      |         |    |                |      |     |     |      |         |  |           |  |    |      |     |    |     |      |     |     |      |         |  |           |  |    |      |     |    |     |      |     |     |      |         |  |           |  |    |      |     |   |     |      |     |     |      |         |  |          |  |    |      |     |   |     |      |     |     |
| 10    | Pine      | DCM                     | /               | Air                   | 68.4  | 6.4   | 0.0   | 25.2  |    |      |         |    |                 |      |      |     |      |         |  |           |  |    |      |         |    |                 |      |      |     |      |         |  |           |  |    |      |         |    |                 |      |      |     |      |         |  |           |  |    |      |         |    |                 |      |     |     |      |         |  |           |  |    |      |         |    |                 |      |     |     |      |         |  |           |  |    |      |         |    |                 |      |     |     |      |         |  |           |  |    |      |         |    |                 |      |     |     |      |         |  |           |  |    |      |         |    |                 |      |     |     |      |         |  |           |  |    |      |         |    |                 |      |     |     |      |         |  |           |  |    |      |         |    |                 |      |     |     |      |         |  |           |  |    |      |         |    |                 |      |     |     |      |         |  |           |  |    |      |         |    |                 |      |     |     |      |         |  |           |  |    |      |         |    |                 |      |     |     |      |         |  |           |  |    |      |         |    |                |      |     |     |      |         |  |           |  |    |      |     |    |     |      |     |     |      |         |  |           |  |    |      |     |    |     |      |     |     |      |         |  |           |  |    |      |     |   |     |      |     |     |      |         |  |          |  |    |      |     |   |     |      |     |     |
|       | Sawdust   |                         |                 |                       |       |       |       |       | 11 | Pine | DCM     | /  | CO <sub>2</sub> | 69.2 | 6.3  | 0.0 | 24.5 | Sawdust |  |           |  | 12 | Pine | DCM     | /  | N <sub>2</sub>  | 68.0 | 6.8  | 0.0 | 25.2 | Sawdust |  |           |  | 13 | Pine | 2-MeTHF | /  | Air             | 70.2 | 6.7  | 0.0 | 23.1 | Sawdust |  |           |  | 14 | Pine | 2-MeTHF | /  | CO <sub>2</sub> | 67.4 | 5.6 | 0.0 | 27.0 | Sawdust |  |           |  | 15 | Pine | 2-MeTHF | /  | N <sub>2</sub>  | 65.8 | 6.5 | 0.3 | 27.4 | Sawdust |  |           |  | 16 | Pine | DCM     | 5  | Air             | 71.6 | 7.8 | 0.2 | 20.4 | Sawdust |  | (2-MeTHF) |  | 17 | Pine | DCM     | 10 | Air             | 69.0 | 7.3 | 0.3 | 23.4 | Sawdust |  | (2-MeTHF) |  | 18 | Pine | DCM     | 5  | Air             | 69.5 | 6.4 | 0.0 | 24.1 | Sawdust |  | (THF)     |  | 19 | Pine | DCM     | 5  | Air             | 68.8 | 6.7 | 0.0 | 24.5 | Sawdust |  | (1-BuOH)  |  |    |      |         |    |                 |      |     |     |      |         |  |           |  |    |      |         |    |                 |      |     |     |      |         |  |           |  |    |      |         |    |                 |      |     |     |      |         |  |           |  |    |      |         |    |                 |      |     |     |      |         |  |           |  |    |      |         |    |                |      |     |     |      |         |  |           |  |    |      |     |    |     |      |     |     |      |         |  |           |  |    |      |     |    |     |      |     |     |      |         |  |           |  |    |      |     |   |     |      |     |     |      |         |  |          |  |    |      |     |   |     |      |     |     |
| 11    | Pine      | DCM                     | /               | CO <sub>2</sub>       | 69.2  | 6.3   | 0.0   | 24.5  |    |      |         |    |                 |      |      |     |      |         |  |           |  |    |      |         |    |                 |      |      |     |      |         |  |           |  |    |      |         |    |                 |      |      |     |      |         |  |           |  |    |      |         |    |                 |      |     |     |      |         |  |           |  |    |      |         |    |                 |      |     |     |      |         |  |           |  |    |      |         |    |                 |      |     |     |      |         |  |           |  |    |      |         |    |                 |      |     |     |      |         |  |           |  |    |      |         |    |                 |      |     |     |      |         |  |           |  |    |      |         |    |                 |      |     |     |      |         |  |           |  |    |      |         |    |                 |      |     |     |      |         |  |           |  |    |      |         |    |                 |      |     |     |      |         |  |           |  |    |      |         |    |                 |      |     |     |      |         |  |           |  |    |      |         |    |                 |      |     |     |      |         |  |           |  |    |      |         |    |                |      |     |     |      |         |  |           |  |    |      |     |    |     |      |     |     |      |         |  |           |  |    |      |     |    |     |      |     |     |      |         |  |           |  |    |      |     |   |     |      |     |     |      |         |  |          |  |    |      |     |   |     |      |     |     |
|       | Sawdust   |                         |                 |                       |       |       |       |       | 12 | Pine | DCM     | /  | N <sub>2</sub>  | 68.0 | 6.8  | 0.0 | 25.2 | Sawdust |  |           |  | 13 | Pine | 2-MeTHF | /  | Air             | 70.2 | 6.7  | 0.0 | 23.1 | Sawdust |  |           |  | 14 | Pine | 2-MeTHF | /  | CO <sub>2</sub> | 67.4 | 5.6  | 0.0 | 27.0 | Sawdust |  |           |  | 15 | Pine | 2-MeTHF | /  | N <sub>2</sub>  | 65.8 | 6.5 | 0.3 | 27.4 | Sawdust |  |           |  | 16 | Pine | DCM     | 5  | Air             | 71.6 | 7.8 | 0.2 | 20.4 | Sawdust |  | (2-MeTHF) |  | 17 | Pine | DCM     | 10 | Air             | 69.0 | 7.3 | 0.3 | 23.4 | Sawdust |  | (2-MeTHF) |  | 18 | Pine | DCM     | 5  | Air             | 69.5 | 6.4 | 0.0 | 24.1 | Sawdust |  | (THF)     |  | 19 | Pine | DCM     | 5  | Air             | 68.8 | 6.7 | 0.0 | 24.5 | Sawdust |  | (1-BuOH)  |  |    |      |         |    |                 |      |     |     |      |         |  |           |  |    |      |         |    |                 |      |     |     |      |         |  |           |  |    |      |         |    |                 |      |     |     |      |         |  |           |  |    |      |         |    |                 |      |     |     |      |         |  |           |  |    |      |         |    |                 |      |     |     |      |         |  |           |  |    |      |         |    |                |      |     |     |      |         |  |           |  |    |      |     |    |     |      |     |     |      |         |  |           |  |    |      |     |    |     |      |     |     |      |         |  |           |  |    |      |     |   |     |      |     |     |      |         |  |          |  |    |      |     |   |     |      |     |     |
| 12    | Pine      | DCM                     | /               | N <sub>2</sub>        | 68.0  | 6.8   | 0.0   | 25.2  |    |      |         |    |                 |      |      |     |      |         |  |           |  |    |      |         |    |                 |      |      |     |      |         |  |           |  |    |      |         |    |                 |      |      |     |      |         |  |           |  |    |      |         |    |                 |      |     |     |      |         |  |           |  |    |      |         |    |                 |      |     |     |      |         |  |           |  |    |      |         |    |                 |      |     |     |      |         |  |           |  |    |      |         |    |                 |      |     |     |      |         |  |           |  |    |      |         |    |                 |      |     |     |      |         |  |           |  |    |      |         |    |                 |      |     |     |      |         |  |           |  |    |      |         |    |                 |      |     |     |      |         |  |           |  |    |      |         |    |                 |      |     |     |      |         |  |           |  |    |      |         |    |                 |      |     |     |      |         |  |           |  |    |      |         |    |                 |      |     |     |      |         |  |           |  |    |      |         |    |                |      |     |     |      |         |  |           |  |    |      |     |    |     |      |     |     |      |         |  |           |  |    |      |     |    |     |      |     |     |      |         |  |           |  |    |      |     |   |     |      |     |     |      |         |  |          |  |    |      |     |   |     |      |     |     |
|       | Sawdust   |                         |                 |                       |       |       |       |       | 13 | Pine | 2-MeTHF | /  | Air             | 70.2 | 6.7  | 0.0 | 23.1 | Sawdust |  |           |  | 14 | Pine | 2-MeTHF | /  | CO <sub>2</sub> | 67.4 | 5.6  | 0.0 | 27.0 | Sawdust |  |           |  | 15 | Pine | 2-MeTHF | /  | N <sub>2</sub>  | 65.8 | 6.5  | 0.3 | 27.4 | Sawdust |  |           |  | 16 | Pine | DCM     | 5  | Air             | 71.6 | 7.8 | 0.2 | 20.4 | Sawdust |  | (2-MeTHF) |  | 17 | Pine | DCM     | 10 | Air             | 69.0 | 7.3 | 0.3 | 23.4 | Sawdust |  | (2-MeTHF) |  | 18 | Pine | DCM     | 5  | Air             | 69.5 | 6.4 | 0.0 | 24.1 | Sawdust |  | (THF)     |  | 19 | Pine | DCM     | 5  | Air             | 68.8 | 6.7 | 0.0 | 24.5 | Sawdust |  | (1-BuOH)  |  |    |      |         |    |                 |      |     |     |      |         |  |           |  |    |      |         |    |                 |      |     |     |      |         |  |           |  |    |      |         |    |                 |      |     |     |      |         |  |           |  |    |      |         |    |                 |      |     |     |      |         |  |           |  |    |      |         |    |                 |      |     |     |      |         |  |           |  |    |      |         |    |                 |      |     |     |      |         |  |           |  |    |      |         |    |                |      |     |     |      |         |  |           |  |    |      |     |    |     |      |     |     |      |         |  |           |  |    |      |     |    |     |      |     |     |      |         |  |           |  |    |      |     |   |     |      |     |     |      |         |  |          |  |    |      |     |   |     |      |     |     |
| 13    | Pine      | 2-MeTHF                 | /               | Air                   | 70.2  | 6.7   | 0.0   | 23.1  |    |      |         |    |                 |      |      |     |      |         |  |           |  |    |      |         |    |                 |      |      |     |      |         |  |           |  |    |      |         |    |                 |      |      |     |      |         |  |           |  |    |      |         |    |                 |      |     |     |      |         |  |           |  |    |      |         |    |                 |      |     |     |      |         |  |           |  |    |      |         |    |                 |      |     |     |      |         |  |           |  |    |      |         |    |                 |      |     |     |      |         |  |           |  |    |      |         |    |                 |      |     |     |      |         |  |           |  |    |      |         |    |                 |      |     |     |      |         |  |           |  |    |      |         |    |                 |      |     |     |      |         |  |           |  |    |      |         |    |                 |      |     |     |      |         |  |           |  |    |      |         |    |                 |      |     |     |      |         |  |           |  |    |      |         |    |                 |      |     |     |      |         |  |           |  |    |      |         |    |                |      |     |     |      |         |  |           |  |    |      |     |    |     |      |     |     |      |         |  |           |  |    |      |     |    |     |      |     |     |      |         |  |           |  |    |      |     |   |     |      |     |     |      |         |  |          |  |    |      |     |   |     |      |     |     |
|       | Sawdust   |                         |                 |                       |       |       |       |       | 14 | Pine | 2-MeTHF | /  | CO <sub>2</sub> | 67.4 | 5.6  | 0.0 | 27.0 | Sawdust |  |           |  | 15 | Pine | 2-MeTHF | /  | N <sub>2</sub>  | 65.8 | 6.5  | 0.3 | 27.4 | Sawdust |  |           |  | 16 | Pine | DCM     | 5  | Air             | 71.6 | 7.8  | 0.2 | 20.4 | Sawdust |  | (2-MeTHF) |  | 17 | Pine | DCM     | 10 | Air             | 69.0 | 7.3 | 0.3 | 23.4 | Sawdust |  | (2-MeTHF) |  | 18 | Pine | DCM     | 5  | Air             | 69.5 | 6.4 | 0.0 | 24.1 | Sawdust |  | (THF)     |  | 19 | Pine | DCM     | 5  | Air             | 68.8 | 6.7 | 0.0 | 24.5 | Sawdust |  | (1-BuOH)  |  |    |      |         |    |                 |      |     |     |      |         |  |           |  |    |      |         |    |                 |      |     |     |      |         |  |           |  |    |      |         |    |                 |      |     |     |      |         |  |           |  |    |      |         |    |                 |      |     |     |      |         |  |           |  |    |      |         |    |                 |      |     |     |      |         |  |           |  |    |      |         |    |                 |      |     |     |      |         |  |           |  |    |      |         |    |                 |      |     |     |      |         |  |           |  |    |      |         |    |                |      |     |     |      |         |  |           |  |    |      |     |    |     |      |     |     |      |         |  |           |  |    |      |     |    |     |      |     |     |      |         |  |           |  |    |      |     |   |     |      |     |     |      |         |  |          |  |    |      |     |   |     |      |     |     |
| 14    | Pine      | 2-MeTHF                 | /               | CO <sub>2</sub>       | 67.4  | 5.6   | 0.0   | 27.0  |    |      |         |    |                 |      |      |     |      |         |  |           |  |    |      |         |    |                 |      |      |     |      |         |  |           |  |    |      |         |    |                 |      |      |     |      |         |  |           |  |    |      |         |    |                 |      |     |     |      |         |  |           |  |    |      |         |    |                 |      |     |     |      |         |  |           |  |    |      |         |    |                 |      |     |     |      |         |  |           |  |    |      |         |    |                 |      |     |     |      |         |  |           |  |    |      |         |    |                 |      |     |     |      |         |  |           |  |    |      |         |    |                 |      |     |     |      |         |  |           |  |    |      |         |    |                 |      |     |     |      |         |  |           |  |    |      |         |    |                 |      |     |     |      |         |  |           |  |    |      |         |    |                 |      |     |     |      |         |  |           |  |    |      |         |    |                 |      |     |     |      |         |  |           |  |    |      |         |    |                |      |     |     |      |         |  |           |  |    |      |     |    |     |      |     |     |      |         |  |           |  |    |      |     |    |     |      |     |     |      |         |  |           |  |    |      |     |   |     |      |     |     |      |         |  |          |  |    |      |     |   |     |      |     |     |
|       | Sawdust   |                         |                 |                       |       |       |       |       | 15 | Pine | 2-MeTHF | /  | N <sub>2</sub>  | 65.8 | 6.5  | 0.3 | 27.4 | Sawdust |  |           |  | 16 | Pine | DCM     | 5  | Air             | 71.6 | 7.8  | 0.2 | 20.4 | Sawdust |  | (2-MeTHF) |  | 17 | Pine | DCM     | 10 | Air             | 69.0 | 7.3  | 0.3 | 23.4 | Sawdust |  | (2-MeTHF) |  | 18 | Pine | DCM     | 5  | Air             | 69.5 | 6.4 | 0.0 | 24.1 | Sawdust |  | (THF)     |  | 19 | Pine | DCM     | 5  | Air             | 68.8 | 6.7 | 0.0 | 24.5 | Sawdust |  | (1-BuOH)  |  |    |      |         |    |                 |      |     |     |      |         |  |           |  |    |      |         |    |                 |      |     |     |      |         |  |           |  |    |      |         |    |                 |      |     |     |      |         |  |           |  |    |      |         |    |                 |      |     |     |      |         |  |           |  |    |      |         |    |                 |      |     |     |      |         |  |           |  |    |      |         |    |                 |      |     |     |      |         |  |           |  |    |      |         |    |                 |      |     |     |      |         |  |           |  |    |      |         |    |                 |      |     |     |      |         |  |           |  |    |      |         |    |                |      |     |     |      |         |  |           |  |    |      |     |    |     |      |     |     |      |         |  |           |  |    |      |     |    |     |      |     |     |      |         |  |           |  |    |      |     |   |     |      |     |     |      |         |  |          |  |    |      |     |   |     |      |     |     |
| 15    | Pine      | 2-MeTHF                 | /               | N <sub>2</sub>        | 65.8  | 6.5   | 0.3   | 27.4  |    |      |         |    |                 |      |      |     |      |         |  |           |  |    |      |         |    |                 |      |      |     |      |         |  |           |  |    |      |         |    |                 |      |      |     |      |         |  |           |  |    |      |         |    |                 |      |     |     |      |         |  |           |  |    |      |         |    |                 |      |     |     |      |         |  |           |  |    |      |         |    |                 |      |     |     |      |         |  |           |  |    |      |         |    |                 |      |     |     |      |         |  |           |  |    |      |         |    |                 |      |     |     |      |         |  |           |  |    |      |         |    |                 |      |     |     |      |         |  |           |  |    |      |         |    |                 |      |     |     |      |         |  |           |  |    |      |         |    |                 |      |     |     |      |         |  |           |  |    |      |         |    |                 |      |     |     |      |         |  |           |  |    |      |         |    |                 |      |     |     |      |         |  |           |  |    |      |         |    |                |      |     |     |      |         |  |           |  |    |      |     |    |     |      |     |     |      |         |  |           |  |    |      |     |    |     |      |     |     |      |         |  |           |  |    |      |     |   |     |      |     |     |      |         |  |          |  |    |      |     |   |     |      |     |     |
|       | Sawdust   |                         |                 |                       |       |       |       |       | 16 | Pine | DCM     | 5  | Air             | 71.6 | 7.8  | 0.2 | 20.4 | Sawdust |  | (2-MeTHF) |  | 17 | Pine | DCM     | 10 | Air             | 69.0 | 7.3  | 0.3 | 23.4 | Sawdust |  | (2-MeTHF) |  | 18 | Pine | DCM     | 5  | Air             | 69.5 | 6.4  | 0.0 | 24.1 | Sawdust |  | (THF)     |  | 19 | Pine | DCM     | 5  | Air             | 68.8 | 6.7 | 0.0 | 24.5 | Sawdust |  | (1-BuOH)  |  |    |      |         |    |                 |      |     |     |      |         |  |           |  |    |      |         |    |                 |      |     |     |      |         |  |           |  |    |      |         |    |                 |      |     |     |      |         |  |           |  |    |      |         |    |                 |      |     |     |      |         |  |           |  |    |      |         |    |                 |      |     |     |      |         |  |           |  |    |      |         |    |                 |      |     |     |      |         |  |           |  |    |      |         |    |                 |      |     |     |      |         |  |           |  |    |      |         |    |                 |      |     |     |      |         |  |           |  |    |      |         |    |                 |      |     |     |      |         |  |           |  |    |      |         |    |                |      |     |     |      |         |  |           |  |    |      |     |    |     |      |     |     |      |         |  |           |  |    |      |     |    |     |      |     |     |      |         |  |           |  |    |      |     |   |     |      |     |     |      |         |  |          |  |    |      |     |   |     |      |     |     |
| 16    | Pine      | DCM                     | 5               | Air                   | 71.6  | 7.8   | 0.2   | 20.4  |    |      |         |    |                 |      |      |     |      |         |  |           |  |    |      |         |    |                 |      |      |     |      |         |  |           |  |    |      |         |    |                 |      |      |     |      |         |  |           |  |    |      |         |    |                 |      |     |     |      |         |  |           |  |    |      |         |    |                 |      |     |     |      |         |  |           |  |    |      |         |    |                 |      |     |     |      |         |  |           |  |    |      |         |    |                 |      |     |     |      |         |  |           |  |    |      |         |    |                 |      |     |     |      |         |  |           |  |    |      |         |    |                 |      |     |     |      |         |  |           |  |    |      |         |    |                 |      |     |     |      |         |  |           |  |    |      |         |    |                 |      |     |     |      |         |  |           |  |    |      |         |    |                 |      |     |     |      |         |  |           |  |    |      |         |    |                 |      |     |     |      |         |  |           |  |    |      |         |    |                |      |     |     |      |         |  |           |  |    |      |     |    |     |      |     |     |      |         |  |           |  |    |      |     |    |     |      |     |     |      |         |  |           |  |    |      |     |   |     |      |     |     |      |         |  |          |  |    |      |     |   |     |      |     |     |
|       | Sawdust   |                         | (2-MeTHF)       |                       |       |       |       |       | 17 | Pine | DCM     | 10 | Air             | 69.0 | 7.3  | 0.3 | 23.4 | Sawdust |  | (2-MeTHF) |  | 18 | Pine | DCM     | 5  | Air             | 69.5 | 6.4  | 0.0 | 24.1 | Sawdust |  | (THF)     |  | 19 | Pine | DCM     | 5  | Air             | 68.8 | 6.7  | 0.0 | 24.5 | Sawdust |  | (1-BuOH)  |  |    |      |         |    |                 |      |     |     |      |         |  |           |  |    |      |         |    |                 |      |     |     |      |         |  |           |  |    |      |         |    |                 |      |     |     |      |         |  |           |  |    |      |         |    |                 |      |     |     |      |         |  |           |  |    |      |         |    |                 |      |     |     |      |         |  |           |  |    |      |         |    |                 |      |     |     |      |         |  |           |  |    |      |         |    |                 |      |     |     |      |         |  |           |  |    |      |         |    |                 |      |     |     |      |         |  |           |  |    |      |         |    |                 |      |     |     |      |         |  |           |  |    |      |         |    |                 |      |     |     |      |         |  |           |  |    |      |         |    |                |      |     |     |      |         |  |           |  |    |      |     |    |     |      |     |     |      |         |  |           |  |    |      |     |    |     |      |     |     |      |         |  |           |  |    |      |     |   |     |      |     |     |      |         |  |          |  |    |      |     |   |     |      |     |     |
| 17    | Pine      | DCM                     | 10              | Air                   | 69.0  | 7.3   | 0.3   | 23.4  |    |      |         |    |                 |      |      |     |      |         |  |           |  |    |      |         |    |                 |      |      |     |      |         |  |           |  |    |      |         |    |                 |      |      |     |      |         |  |           |  |    |      |         |    |                 |      |     |     |      |         |  |           |  |    |      |         |    |                 |      |     |     |      |         |  |           |  |    |      |         |    |                 |      |     |     |      |         |  |           |  |    |      |         |    |                 |      |     |     |      |         |  |           |  |    |      |         |    |                 |      |     |     |      |         |  |           |  |    |      |         |    |                 |      |     |     |      |         |  |           |  |    |      |         |    |                 |      |     |     |      |         |  |           |  |    |      |         |    |                 |      |     |     |      |         |  |           |  |    |      |         |    |                 |      |     |     |      |         |  |           |  |    |      |         |    |                 |      |     |     |      |         |  |           |  |    |      |         |    |                |      |     |     |      |         |  |           |  |    |      |     |    |     |      |     |     |      |         |  |           |  |    |      |     |    |     |      |     |     |      |         |  |           |  |    |      |     |   |     |      |     |     |      |         |  |          |  |    |      |     |   |     |      |     |     |
|       | Sawdust   |                         | (2-MeTHF)       |                       |       |       |       |       | 18 | Pine | DCM     | 5  | Air             | 69.5 | 6.4  | 0.0 | 24.1 | Sawdust |  | (THF)     |  | 19 | Pine | DCM     | 5  | Air             | 68.8 | 6.7  | 0.0 | 24.5 | Sawdust |  | (1-BuOH)  |  |    |      |         |    |                 |      |      |     |      |         |  |           |  |    |      |         |    |                 |      |     |     |      |         |  |           |  |    |      |         |    |                 |      |     |     |      |         |  |           |  |    |      |         |    |                 |      |     |     |      |         |  |           |  |    |      |         |    |                 |      |     |     |      |         |  |           |  |    |      |         |    |                 |      |     |     |      |         |  |           |  |    |      |         |    |                 |      |     |     |      |         |  |           |  |    |      |         |    |                 |      |     |     |      |         |  |           |  |    |      |         |    |                 |      |     |     |      |         |  |           |  |    |      |         |    |                 |      |     |     |      |         |  |           |  |    |      |         |    |                 |      |     |     |      |         |  |           |  |    |      |         |    |                |      |     |     |      |         |  |           |  |    |      |     |    |     |      |     |     |      |         |  |           |  |    |      |     |    |     |      |     |     |      |         |  |           |  |    |      |     |   |     |      |     |     |      |         |  |          |  |    |      |     |   |     |      |     |     |
| 18    | Pine      | DCM                     | 5               | Air                   | 69.5  | 6.4   | 0.0   | 24.1  |    |      |         |    |                 |      |      |     |      |         |  |           |  |    |      |         |    |                 |      |      |     |      |         |  |           |  |    |      |         |    |                 |      |      |     |      |         |  |           |  |    |      |         |    |                 |      |     |     |      |         |  |           |  |    |      |         |    |                 |      |     |     |      |         |  |           |  |    |      |         |    |                 |      |     |     |      |         |  |           |  |    |      |         |    |                 |      |     |     |      |         |  |           |  |    |      |         |    |                 |      |     |     |      |         |  |           |  |    |      |         |    |                 |      |     |     |      |         |  |           |  |    |      |         |    |                 |      |     |     |      |         |  |           |  |    |      |         |    |                 |      |     |     |      |         |  |           |  |    |      |         |    |                 |      |     |     |      |         |  |           |  |    |      |         |    |                 |      |     |     |      |         |  |           |  |    |      |         |    |                |      |     |     |      |         |  |           |  |    |      |     |    |     |      |     |     |      |         |  |           |  |    |      |     |    |     |      |     |     |      |         |  |           |  |    |      |     |   |     |      |     |     |      |         |  |          |  |    |      |     |   |     |      |     |     |
|       | Sawdust   |                         | (THF)           |                       |       |       |       |       | 19 | Pine | DCM     | 5  | Air             | 68.8 | 6.7  | 0.0 | 24.5 | Sawdust |  | (1-BuOH)  |  |    |      |         |    |                 |      |      |     |      |         |  |           |  |    |      |         |    |                 |      |      |     |      |         |  |           |  |    |      |         |    |                 |      |     |     |      |         |  |           |  |    |      |         |    |                 |      |     |     |      |         |  |           |  |    |      |         |    |                 |      |     |     |      |         |  |           |  |    |      |         |    |                 |      |     |     |      |         |  |           |  |    |      |         |    |                 |      |     |     |      |         |  |           |  |    |      |         |    |                 |      |     |     |      |         |  |           |  |    |      |         |    |                 |      |     |     |      |         |  |           |  |    |      |         |    |                 |      |     |     |      |         |  |           |  |    |      |         |    |                 |      |     |     |      |         |  |           |  |    |      |         |    |                 |      |     |     |      |         |  |           |  |    |      |         |    |                |      |     |     |      |         |  |           |  |    |      |     |    |     |      |     |     |      |         |  |           |  |    |      |     |    |     |      |     |     |      |         |  |           |  |    |      |     |   |     |      |     |     |      |         |  |          |  |    |      |     |   |     |      |     |     |
| 19    | Pine      | DCM                     | 5               | Air                   | 68.8  | 6.7   | 0.0   | 24.5  |    |      |         |    |                 |      |      |     |      |         |  |           |  |    |      |         |    |                 |      |      |     |      |         |  |           |  |    |      |         |    |                 |      |      |     |      |         |  |           |  |    |      |         |    |                 |      |     |     |      |         |  |           |  |    |      |         |    |                 |      |     |     |      |         |  |           |  |    |      |         |    |                 |      |     |     |      |         |  |           |  |    |      |         |    |                 |      |     |     |      |         |  |           |  |    |      |         |    |                 |      |     |     |      |         |  |           |  |    |      |         |    |                 |      |     |     |      |         |  |           |  |    |      |         |    |                 |      |     |     |      |         |  |           |  |    |      |         |    |                 |      |     |     |      |         |  |           |  |    |      |         |    |                 |      |     |     |      |         |  |           |  |    |      |         |    |                 |      |     |     |      |         |  |           |  |    |      |         |    |                |      |     |     |      |         |  |           |  |    |      |     |    |     |      |     |     |      |         |  |           |  |    |      |     |    |     |      |     |     |      |         |  |           |  |    |      |     |   |     |      |     |     |      |         |  |          |  |    |      |     |   |     |      |     |     |
|       | Sawdust   |                         | (1-BuOH)        |                       |       |       |       |       |    |      |         |    |                 |      |      |     |      |         |  |           |  |    |      |         |    |                 |      |      |     |      |         |  |           |  |    |      |         |    |                 |      |      |     |      |         |  |           |  |    |      |         |    |                 |      |     |     |      |         |  |           |  |    |      |         |    |                 |      |     |     |      |         |  |           |  |    |      |         |    |                 |      |     |     |      |         |  |           |  |    |      |         |    |                 |      |     |     |      |         |  |           |  |    |      |         |    |                 |      |     |     |      |         |  |           |  |    |      |         |    |                 |      |     |     |      |         |  |           |  |    |      |         |    |                 |      |     |     |      |         |  |           |  |    |      |         |    |                 |      |     |     |      |         |  |           |  |    |      |         |    |                 |      |     |     |      |         |  |           |  |    |      |         |    |                 |      |     |     |      |         |  |           |  |    |      |         |    |                |      |     |     |      |         |  |           |  |    |      |     |    |     |      |     |     |      |         |  |           |  |    |      |     |    |     |      |     |     |      |         |  |           |  |    |      |     |   |     |      |     |     |      |         |  |          |  |    |      |     |   |     |      |     |     |

|     |                 |         |                 |                 |      |     |     |      |
|-----|-----------------|---------|-----------------|-----------------|------|-----|-----|------|
| 20  | Pine<br>Sawdust | DCM     | 5<br>(EtOH)     | Air             | 69.8 | 5.7 | 0.0 | 24.5 |
| ^21 | Pine<br>Sawdust | DCM     | /               | Air             | 69.2 | 6.9 | 0.0 | 23.9 |
| ^22 | Pine<br>Sawdust | 2-MeTHF | /               | Air             | 64.2 | 6.7 | 0.1 | 29.0 |
| 23  | Paper<br>Towel  | DCM     | /               | Air             | 70.1 | 7.0 | 0.3 | 22.6 |
| 24  | Paper<br>Towel  | DCM     | /               | CO <sub>2</sub> | 71.5 | 7.2 | 0.1 | 21.2 |
| 25  | Paper<br>Towel  | 2-MeTHF | /               | Air             | 65.2 | 7.0 | 0.1 | 27.7 |
| 26  | Paper<br>Towel  | 2-MeTHF | /               | CO <sub>2</sub> | 66.6 | 7.3 | 0.4 | 25.7 |
| 27  | Paper<br>Towel  | DCM     | 5<br>(2-MeTHF)  | Air             | 69.8 | 7.4 | 0.4 | 22.4 |
| 28  | Paper<br>Towel  | DCM     | 10<br>(2-MeTHF) | Air             | 71.2 | 7.3 | 0.2 | 21.3 |
| 29  | Paper<br>Towel  | DCM     | 5<br>(THF)      | Air             | 70.3 | 7.2 | 0.2 | 22.3 |
| 30  | Paper<br>Towel  | DCM     | 5<br>(1-BuOH)   | Air             | 68.3 | 6.6 | 0.0 | 25.0 |
| 31  | Paper<br>Towel  | DCM     | 5<br>(EtOH)     | Air             | 68.8 | 6.7 | 0.0 | 24.5 |

^30mL of 0.1M NaOH was used.

**Table S5.** Percentage change in biocrude yield and HHV when comparing the extraction performance of DCM and 2-MeTHF.

| Entry           | Substrate    | Extraction solvent | Processing atmosphere | Biocrude (%) | % change (% [N#]) | HHV (MJ kg <sup>-1</sup> ) | % change (% [N#]) |
|-----------------|--------------|--------------------|-----------------------|--------------|-------------------|----------------------------|-------------------|
| 1               | TCM Residue  | DCM                | Air                   | 10.1         |                   | 39.7                       |                   |
| 2               | TCM Residue  | DCM                | CO <sub>2</sub>       | 10.7         |                   | 34.3                       |                   |
| 3               | TCM Residue  | 2-MeTHF            | Air                   | 11.6         | +40.2 [1]         | 38.9                       | -2.0 [1]          |
| 4               | TCM Residue  | 2-MeTHF            | CO <sub>2</sub>       | 13.7         | +28.0 [2]         | 40.2                       | +17.2 [2]         |
| 5               | Pine Sawdust | DCM                | Air                   | 22.8         |                   | 28.1                       |                   |
| 6               | Pine Sawdust | DCM                | CO <sub>2</sub>       | 19.2         |                   | 28.4                       |                   |
| 7               | Pine Sawdust | DCM                | N <sub>2</sub>        | 9.7          |                   | 28.6                       |                   |
| 8               | Pine Sawdust | 2-MeTHF            | Air                   | 28.1         | +23.2 [5]         | 29.4                       | +4.6 [5]          |
| 9               | Pine Sawdust | 2-MeTHF            | CO <sub>2</sub>       | 30.8         | +60.4 [6]         | 26.5                       | -6.7 [6]          |
| 10              | Pine Sawdust | 2-MeTHF            | N <sub>2</sub>        | 18.9         | +94.8 [7]         | 27.0                       | -5.6 [7]          |
| 11 <sup>^</sup> | Pine Sawdust | DCM                | Air                   | 27.9         |                   | 29.3                       |                   |
| 12 <sup>^</sup> | Pine Sawdust | 2-MeTHF            | Air                   | 37.2         | +33.3 [11]        | 26.6                       | -9.2 [11]         |
| 13              | Paper Towel  | DCM                | Air                   | 16.9         |                   | 30.0                       |                   |
| 14              | Paper Towel  | DCM                | CO <sub>2</sub>       | 24.2         |                   | 30.9                       |                   |
| 15              | Paper Towel  | 2-MeTHF            | Air                   | 23.1         | +36.7 [13]        | 27.6                       | -8.0 [13]         |
| 16              | Paper Towel  | 2-MeTHF            | CO <sub>2</sub>       | 25.2         | +4.1 [14]         | 28.7                       | -7.1 [14]         |

<sup>^</sup>30mL of 0.1M NaOH solution was used instead of water.

#N = number of entry comparing to

**Table S6.** Percentage hydrogen distribution of biocrudes from HTL of TCM residue, pine sawdust and paper towel using DCM or 2-MeTHF as the extraction solvent.

| Entry | Substrate    | Extraction solvent | Processing atmosphere | Saturated C-H (0–3.5 ppm) | O-R (3.5–4.5 ppm) | Unsaturated C-H & PhOH (4.5–8.5 ppm) | RCHO & RCOOH (>9 ppm) |
|-------|--------------|--------------------|-----------------------|---------------------------|-------------------|--------------------------------------|-----------------------|
| 1     | TCM Residue  | DCM                | Air                   | 77.5%                     | 5.4%              | 16.3%                                | 0.8%                  |
| 2     | TCM Residue  | DCM                | CO <sub>2</sub>       | 82.0%                     | 4.1%              | 14.0%                                | 0.0%                  |
| 3     | TCM Residue  | 2-MeTHF            | Air                   | 82.1%                     | 3.4%              | 14.5%                                | 0.0%                  |
| 4     | TCM Residue  | 2-MeTHF            | CO <sub>2</sub>       | 77.6%                     | 4.1%              | 18.4%                                | 0.0%                  |
| 5     | Pine Sawdust | DCM                | Air                   | 57.1%                     | 12.6%             | 28.0%                                | 2.3%                  |
| 6     | Pine Sawdust | DCM                | CO <sub>2</sub>       | 50.5%                     | 13.7%             | 34.8%                                | 1.1%                  |
| 7     | Pine Sawdust | DCM                | N <sub>2</sub>        | 71.4%                     | 5.0%              | 22.9%                                | 0.7%                  |
| 8     | Pine Sawdust | 2-MeTHF            | Air                   | 55.0%                     | 6.0%              | 38.0%                                | 1.0%                  |
| 9     | Pine Sawdust | 2-MeTHF            | CO <sub>2</sub>       | 59.6%                     | 6.1%              | 33.4%                                | 1.0%                  |
| 10    | Pine Sawdust | 2-MeTHF            | N <sub>2</sub>        | 59.9%                     | 8.4%              | 31.1%                                | 0.6%                  |
| 11^   | Pine Sawdust | DCM                | Air                   | 62.9%                     | 13.2%             | 23.9%                                | 0.0%                  |
| 12^   | Pine Sawdust | 2-MeTHF            | Air                   | 57.4%                     | 9.0%              | 33.7%                                | 0.0%                  |
| 13    | Paper Towel  | DCM                | Air                   | 70.1%                     | 9.7%              | 20.1%                                | 0.0%                  |
| 14    | Paper Towel  | 2-MeTHF            | Air                   | 68.0%                     | 9.5%              | 22.5%                                | 0.0%                  |
| 15    | Paper Towel  | DCM                | CO <sub>2</sub>       | 71.9%                     | 7.4%              | 19.8%                                | 0.8%                  |
| 16    | Paper Towel  | 2-MeTHF            | CO <sub>2</sub>       | 71.3%                     | 7.0%              | 21.7%                                | 0.0%                  |



**Table S7.** Percentage change in biocrude yield and HHV when 2-MeTHF, THF, 1-BuOH or EtOH was used as the co-solvent.

| Entry | Substrate    | Co-solvent (mL) | Biocrude (%) | % change (% [N <sup>#</sup> ]) | HHV (MJ kg <sup>-1</sup> ) | % change (% [N <sup>#</sup> ]) |
|-------|--------------|-----------------|--------------|--------------------------------|----------------------------|--------------------------------|
| 1     | TCM Residue  | /               | 10.1         |                                | 39.7                       |                                |
| 2     | TCM Residue  | 5 (2-MeTHF)     | 15.0         | +48.5 [1]                      | 35.6                       | -10.3 [1]                      |
| 3     | TCM Residue  | 10 (2-MeTHF)    | 18.1         | +79.2 [1]                      | 36.3                       | -8.6 [1]                       |
| 4     | TCM Residue  | 5 (THF)         | 11.8         | -27.1 [2]                      | 35.9                       | +0.8 [2]                       |
| 5     | TCM Residue  | 5 (1-BuOH)      | 23.4         | +56.0 [2]                      | 32.6                       | -8.4 [2]                       |
| 6     | TCM Residue  | 5 (EtOH)        | 10.8         | -28.0 [2]                      | 35.4                       | -0.6 [2]                       |
| 7     | Pine Sawdust | /               | 22.8         |                                | 28.1                       |                                |
| 8     | Pine Sawdust | 5 (2-MeTHF)     | 35.4         | +55.3 [7]                      | 31.9                       | +13.5 [7]                      |
| 9     | Pine Sawdust | 10 (2-MeTHF)    | 50.9         | +123.2 [7]                     | 29.9                       | +6.4 [7]                       |
| 10    | Pine Sawdust | 5 (THF)         | 24.2         | -46.3 [8]                      | 28.7                       | -11.1 [8]                      |
| 11    | Pine Sawdust | 5 (1-BuOH)      | 30.7         | -13.3 [8]                      | 28.8                       | -9.7 [8]                       |
| 12    | Pine Sawdust | 5 (EtOH)        | 22.1         | -37.6 [8]                      | 27.8                       | -12.9 [8]                      |
| 13    | Paper Towel  | /               | 16.9         |                                | 30.0                       |                                |
| 14    | Paper Towel  | 5 (2-MeTHF)     | 21.0         | +24.3 [13]                     | 30.4                       | +1.3 [13]                      |
| 15    | Paper Towel  | 10 (2-MeTHF)    | 29.3         | +73.4 [13]                     | 30.9                       | +3.0 [13]                      |
| 16    | Paper Towel  | 5 (THF)         | 16.9         | -24.3 [14]                     | 30.3                       | -0.3 [14]                      |
| 17    | Paper Towel  | 5 (1-BuOH)      | 20.4         | -2.9 [14]                      | 28.5                       | -6.3 [14]                      |
| 18    | Paper Towel  | 5 (EtOH)        | 17.0         | -19.0 [14]                     | 28.8                       | -5.3 [14]                      |

#N = number of entry comparing to

**Table S8.** Percentage hydrogen distribution of biocrudes from HTL of TCM residue, pine sawdust and paper towel using 2-MeTHF, THF, 1-BuOH or EtOH as the co-solvent.

| Entry | Substrate    | Co-solvent (mL) | Saturated C-H (0–3.5 ppm) | O–R (3.5–4.5 ppm) | Unsaturated C–H & PhOH (4.5–8.5 ppm) | RCHO & RCOOH (>9 ppm) |
|-------|--------------|-----------------|---------------------------|-------------------|--------------------------------------|-----------------------|
| 1     | TCM Residue  | /               | 77.5%                     | 5.4%              | 16.3%                                | 0.8%                  |
| 2     | TCM Residue  | 2-MeTHF (5)     | 72.4%                     | 5.1%              | 21.4%                                | 1.0%                  |
| 3     | TCM Residue  | 2-MeTHF (10)    | 71.8%                     | 4.5%              | 23.6%                                | 0.0%                  |
| 4     | TCM Residue  | THF (5)         | 75.5%                     | 4.9%              | 18.6%                                | 1.0%                  |
| 5     | TCM Residue  | 1-BuOH (5)      | 80.8%                     | 5.0%              | 14.1%                                | 0.0%                  |
| 6     | TCM Residue  | EtOH (5)        | 79.5%                     | 4.1%              | 16.4%                                | 0.0%                  |
| 7     | Pine Sawdust | /               | 57.1%                     | 12.6%             | 28.0%                                | 2.3%                  |
| 8     | Pine Sawdust | 2-MeTHF (5)     | 55.8%                     | 8.0%              | 36.6%                                | 1.1%                  |
| 9     | Pine Sawdust | 2-MeTHF (10)    | 52.1%                     | 7.9%              | 38.9%                                | 1.0%                  |
| 10    | Pine Sawdust | THF (5)         | 48.5%                     | 10.7%             | 38.2%                                | 2.6%                  |
| 11    | Pine Sawdust | 1-BuOH (5)      | 54.1%                     | 12.8%             | 32.7%                                | 0.4%                  |
| 12    | Pine Sawdust | EtOH (5)        | 53.8%                     | 14.5%             | 30.1%                                | 1.6%                  |
| 13    | Paper Towel  | /               | 70.1%                     | 9.7%              | 20.1%                                | 0.0%                  |
| 14    | Paper Towel  | 2-MeTHF (5)     | 72.5%                     | 6.5%              | 21.0%                                | 0.0%                  |
| 15    | Paper Towel  | 2-MeTHF (10)    | 71.4%                     | 7.9%              | 20.7%                                | 0.0%                  |
| 16    | Paper Towel  | THF (5)         | 69.4%                     | 8.3%              | 22.2%                                | 0.0%                  |
| 17    | Paper Towel  | 1-BuOH (5)      | 70.9%                     | 8.7%              | 20.5%                                | 0.0%                  |
| 18    | Paper Towel  | EtOH (5)        | 72.1%                     | 8.6%              | 25.8%                                | 0.0%                  |

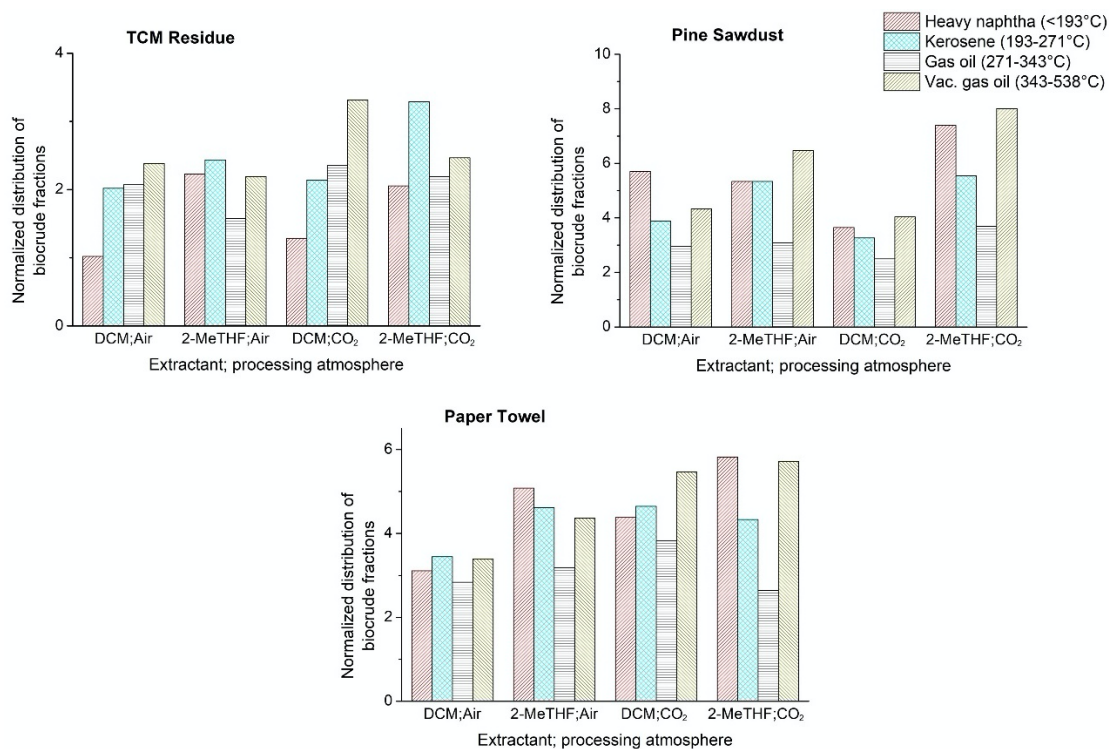

**Fig. S1.** Normalized distribution of biocrude fractions for TCM residue, pine sawdust and paper towel by using DCM or 2-MeTHF as extractant.

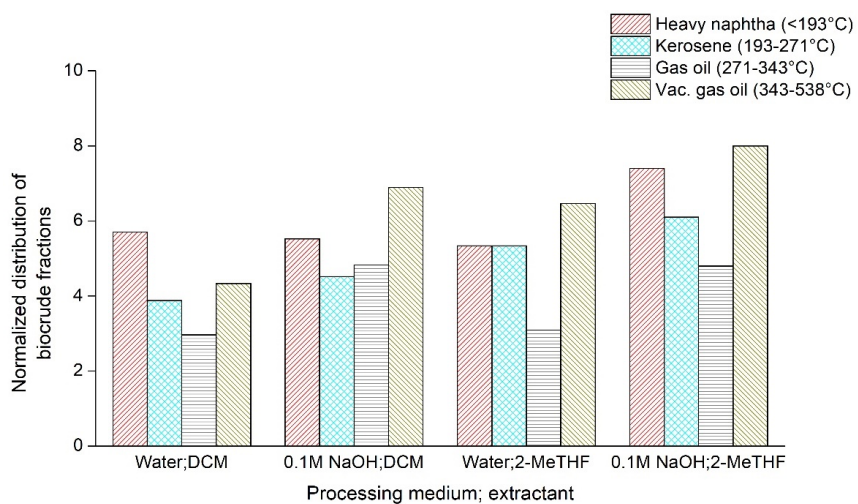

**Fig. S2.** Normalized distribution of biocrude fractions for HTL of TCM residue, pine sawdust and paper towel over 0.1 M NaOH catalyst.

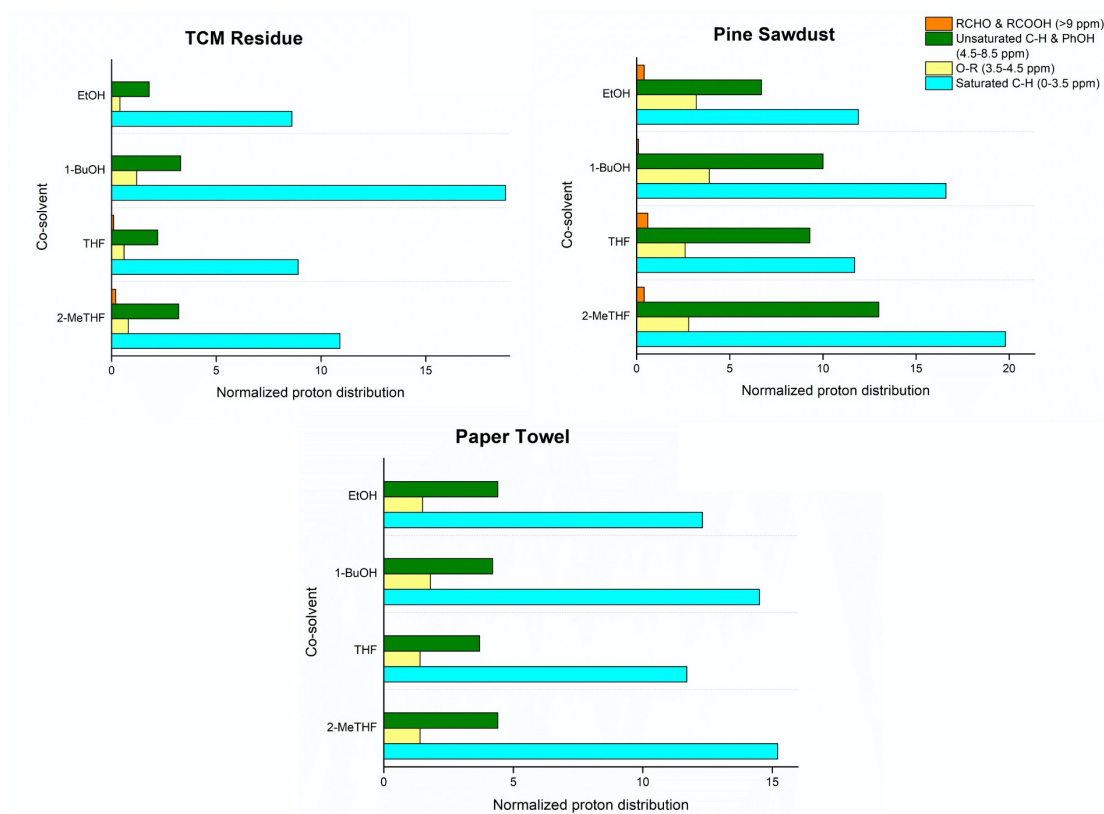

**Fig. S3.** Normalized distribution of biocrude fractions for HTL of TCM residue, pine sawdust and paper towel with 2-MeTHF, THF, 1-BuOH or EtOH as the co-solvents (5 mL).

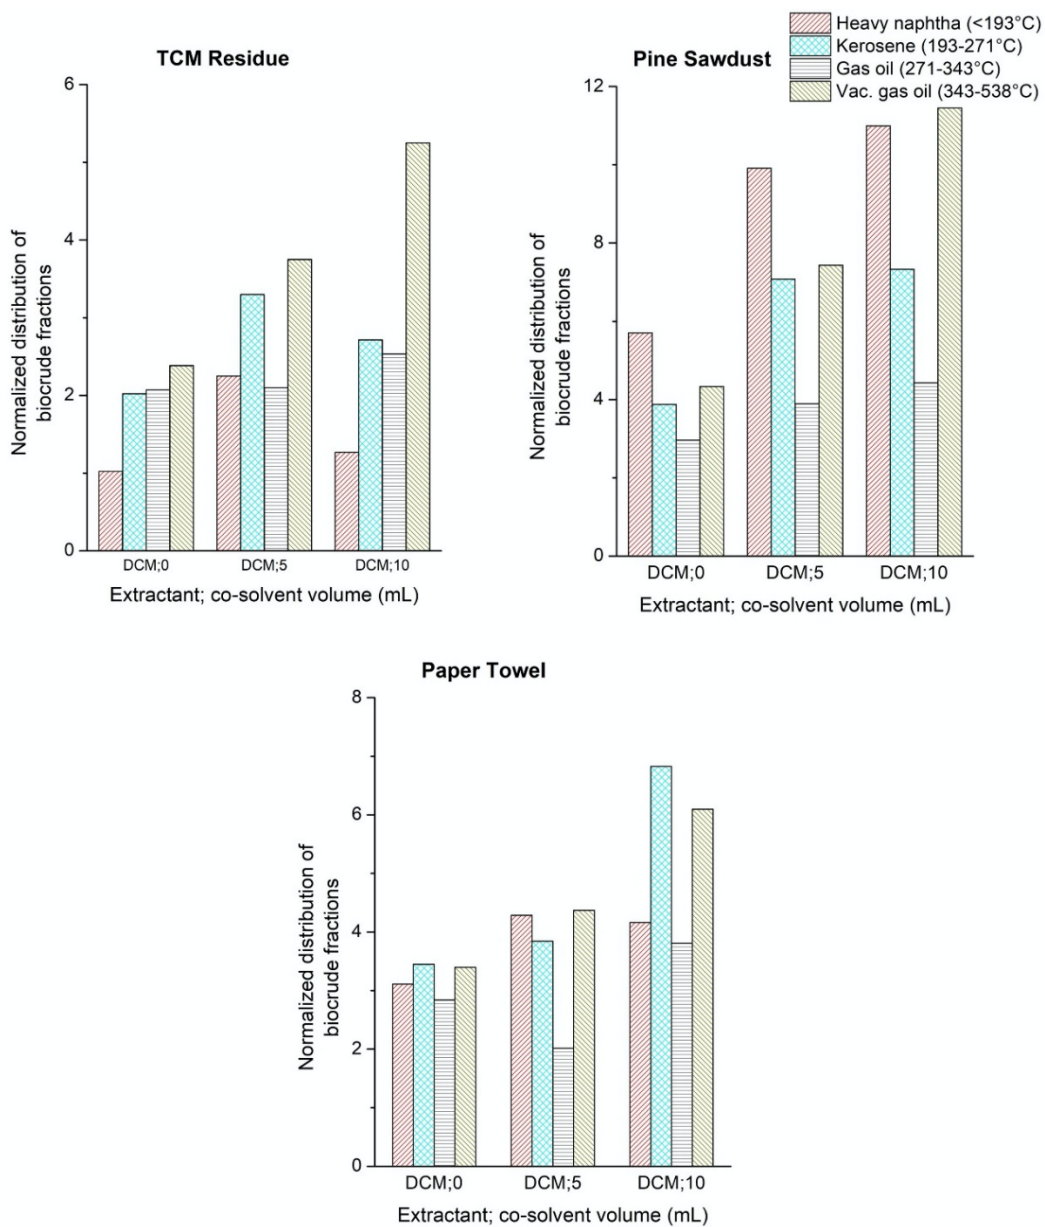

**Fig. S4.** Normalized distribution of biocrude fractions for HTL of TCM residue, pine sawdust and paper towel with increasing amount of 2-MeTHF co-solvent.

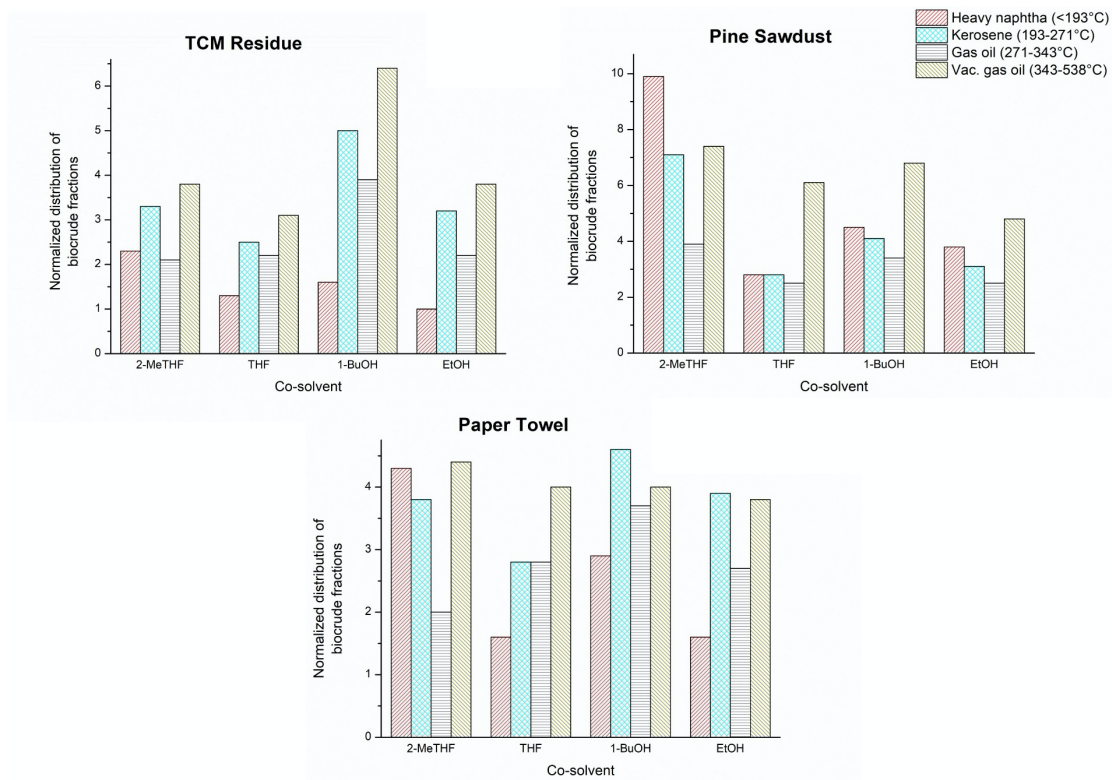

**Fig. S5.** Normalized distribution of biocrude fractions for HTL of TCM residue, pine sawdust and paper towel with 2-MeTHF, THF, 1-BuOH or EtOH as the co-solvents (5 mL).
